# Supplementary material
Source: publisher figshare collection journal article supplement (https://sage.figshare.com/ndownloader/files/12534806)
Supplement: Supplementary file 1 [file 12534806]

**Advancing urban adaptation where it counts: reshaping unequal knowledge and resource diffusion in networked Indonesian cities**

SAMUEL GELDIN

**Supplementary information**

MAPS 1–2 DATA

| <b>City</b>            | <b>Number of participating networks</b> | <b>Participating networks (from Table 1)</b>                                                                                   |
|------------------------|-----------------------------------------|--------------------------------------------------------------------------------------------------------------------------------|
| Jakarta, Java          | 10                                      | Metropolis, UCLG, Sister Cities, CityNet, C40, Compact of Mayors, 100 Resilient Cities, WeGo, PEMSEA, Making Cities Resilient. |
| Surabaya, Java         | 9                                       | Metropolis, UCLG, Sister Cities, CityNet, DELGOSEA, ICLEI, ASEAN ESC, Compact of Mayors, CDIA.                                 |
| Balikpapan, Kalimantan | 8                                       | Metropolis, UCLG, CityNet, ICMA City Links, ICLEI, ASEAN ESC, Compact of Mayors, CDIA.                                         |
| Bandung, Java          | 7                                       | Sister Cities, CityNet, ICMA City Links, ICLEI, Compact of Mayors, WeGo, Making Cities Resilient.                              |
| Semarang, Java         | 7                                       | CityNet, ICMA City Links, ICLEI, ACCCRN, 100 Resilient Cities, CDIA, GIZ Paklim.                                               |
| Yogyakarta, Java       | 7                                       | UCLG, DELGOSEA, ICMA City Links, ICLEI, CDIA, Making Cities Resilient, GIZ Paklim.                                             |
| Banda Aceh, Sumatra    | 6                                       | UCLG, CityNet, ACCCRN LT Cities, Compact of Mayors, CDIA, Making Cities Resilient.                                             |
| Surakarta (Solo), Java | 6                                       | UCLG, DELGOSEA, ICLEI, CDIA, UN Habitat CCCI, GIZ Paklim.                                                                      |
| Bekasi, Java           | 5                                       | CityNet, DELGOSEA, ICMA City Links, ACCCRN LT Cities, CDIA.                                                                    |
| Bogor, Java            | 4                                       | Sister Cities, CityNet, ICLEI, Compact of Mayors.                                                                              |
| Probolinggo, Java      | 4                                       | UCLG, ACCCRN, Compact of Mayors, GIZ Paklim.                                                                                   |
| Tangerang, Java        | 4                                       | ACCCRN LT Cities, ASEAN                                                                                                        |

|                              |   |                                                      |
|------------------------------|---|------------------------------------------------------|
|                              |   | ESC, PEMSEA, CDIA.                                   |
| Palembang, Sumatra           | 4 | CityNet, ACCCRN, ASEAN ESC, CDIA                     |
| Pangkal Pinang, Sumatra      | 4 | UCLG, CityNet, DELGOSEA, ACCCRN LT Cities            |
| Sukabumi, Java               | 4 | CityNet, ICLEI, Compact of Mayors, PEMSEA            |
| Tarakan, Kalimantan          | 4 | CityNet, DELGOSEA, ACCCRN, Compact of Mayors         |
| Jambi, Sumatra               | 3 | UCLG, ICLEI, Compact of Mayors                       |
| Padang, Sumatra              | 3 | DELGOSEA, Compact of Mayors, ACCCRN LT Cities        |
| Cimahi, Java                 | 3 | ASEAN ESC, Compact of Mayors, GIZ Paklim             |
| Pekalongan, Java             | 3 | ACCCRN, UN Habitat CCCI, GIZ Paklim                  |
| Banjarmasin, Kalimantan      | 3 | ACCCRN LT Cities, Compact of Mayors, UN Habitat CCCI |
| Makassar, Sulawesi           | 3 | CityNet, Making Cities Resilient, UN Habitat CCCI    |
| Wakatobi, Sulawesi           | 3 | UCLG, DELGOSEA, ICLEI                                |
| Mataram, Nusa Tenggara       | 3 | ACCCRN LT Cities, Compact of Mayors, CDIA            |
| Batam, Sumatra               | 2 | UCLG, WeGo                                           |
| Medan, Sumatra               | 2 | Sister Cities, ICLEI                                 |
| Tanjung Pinang, Sumatra      | 2 | ICLEI, Compact of Mayors                             |
| Blitar, Java                 | 2 | ACCCRN, GIZ Paklim                                   |
| Salatiga, Java               | 2 | UCLG, GIZ Paklim                                     |
| South Tangerang, Java        | 2 | UCLG, ACCCRN LT Cities                               |
| Samarinda, Kalimantan        | 2 | ICMA City Links, Making Cities Resilient             |
| Gorontalo, Sulawesi          | 2 | Sister Cities, CityNet                               |
| Kendari, Sulawesi            | 2 | DELGOSEA, Compact of Mayors                          |
| Denpasar, Bali/Nusa Tenggara | 2 | PEMSEA, CDIA                                         |
| Kupang, Nusa Tenggara        | 2 | DELGOSEA, Compact of Mayors                          |
| Bandar Lampung, Sumatra      | 1 | ACCCRN                                               |
| Bukittinggi, Sumatra         | 1 | ICMA City Links                                      |
| Metro, Sumatra               | 1 | DELGOSEA                                             |
| Cilegon, Java                | 1 | ICLEI                                                |
| Cirebon, Java                | 1 | ACCCRN                                               |
| Lamongan, Java               | 1 | ASEAN ESC                                            |
| Mojokerto, Java              | 1 | GIZ Paklim                                           |
| Pasuruan, Java               | 1 | GIZ Paklim                                           |
| Serang, Java                 | 1 | WeGo                                                 |

|                           |   |                   |
|---------------------------|---|-------------------|
| Sidoarjo, Java            | 1 | CityNet           |
| Banjarbaru, Kalimantan    | 1 | CityNet           |
| Bontang, Kalimantan       | 1 | Compact of Mayors |
| Pontianak, Kalimantan     | 1 | ACCCRN LT Cities  |
| Singkawang, Kalimantan    | 1 | UCLG              |
| Bau Bau, Sulawesi         | 1 | WeGo              |
| Bitung, Sulawesi          | 1 | ICMA City Links   |
| Manado, Sulawesi          | 1 | ACCCRN LT Cities  |
| Palu, Sulawesi            | 1 | CDIA              |
| Tomohon, Sulawesi         | 1 | CityNet           |
| Tual, Maluku              | 1 | Sister Cities     |
| Bengkulu, Sumatra         | 0 |                   |
| Binjai, Sumatra           | 0 |                   |
| Dumai, Sumatra            | 0 |                   |
| Gunungsitoli, Sumatra     | 0 |                   |
| Langsa, Sumatra           | 0 |                   |
| Lhokseumawe, Sumatra      | 0 |                   |
| Lubuk Linggau, Sumatra    | 0 |                   |
| Padang Sidempuan, Sumatra | 0 |                   |
| Pagar Alam, Sumatra       | 0 |                   |
| Payakumbuh, Sumatra       | 0 |                   |
| Pekanbaru, Sumatra        | 0 |                   |
| Pematang Siantar, Sumatra | 0 |                   |
| Prabumulih, Sumatra       | 0 |                   |
| Tanjung Balai, Sumatra    | 0 |                   |
| Tebing Tinggi, Sumatra    | 0 |                   |
| Depok, Java               | 0 |                   |
| Kediri, Java              | 0 |                   |
| Madiun, Java              | 0 |                   |
| Magelang, Java            | 0 |                   |
| Tasikmalaya, Java         | 0 |                   |
| Tegal, Java               | 0 |                   |
| Palangkaraya, Kalimantan  | 0 |                   |
| Kotamobagu, Sulawesi      | 0 |                   |
| Palopo, Sulawesi          | 0 |                   |
| Parepare, Sulawesi        | 0 |                   |
| Bima, Nusa Tenggara       | 0 |                   |
| Ambon, Maluku             | 0 |                   |
| Ternate, Maluku           | 0 |                   |
| Jayapura, Papua           | 0 |                   |
| Sorong, Papua             | 0 |                   |

NOTES:

Because the BPS Statistics Ministry has not recently classified cities by population (e.g. small, medium, large), the Ministry of Public Works and Housing's classification system was used. All medium-sized cities with 100,000–500,000 people, large cities with 500,000–1 million people,

and metropolitan areas with more than 1 million people according to the last census<sup>(1)</sup> are depicted in Maps 1–2. All medium-sized cities, large cities and metropolitan areas excluding the capital, Jakarta (as defined by Indonesia’s Ministry of Public Works and Housing), fall under this study’s definition of intermediary cities.

While intermediary cities are, broadly speaking, rural–urban exchange centres with 50,000–1 million people, some Indonesian cities with more than 1 million people still function as zones of rural–urban interaction and serve secondary roles in a Jakarta-dominated urban hierarchy. This study considers these cities intermediary as well, aligned with the inclusive definition used by Roberts et al.<sup>(2)</sup> In contrast, Oberman et al.<sup>(3)</sup> classify cities according to a slightly different working definition. They aggregate city populations by urban district boundaries rather than city jurisdiction boundaries, which is why populations in what they term “middleweight” cities span 150,000–10 million. This study chooses to reference Oberman et al.’s population and economic projections, despite their different classification system, because of their clear city-by-city breakdown.

---

<sup>1</sup> <http://sp2010.bps.go.id/index.php/site/index>.

<sup>2</sup> Roberts, B, B Iglesias and J M Llop (2016), “Intermediary cities,” in *Fourth Global Report on Decentralization and Local Democracy: Co-Creating the Urban Future*, UCLG, Barcelona, pages 133–164, accessed 21 June 2017 at [http://www.gold.uclg.org/sites/default/files/GOLDIV\\_ENG.pdf](http://www.gold.uclg.org/sites/default/files/GOLDIV_ENG.pdf).

<sup>3</sup> Oberman, R, R Dobbs, A Budiman, F Thompson and M Rossé (2012), *The Archipelago Economy: Unleashing Indonesia’s Potential*, McKinsey Global Institute, 101 pages, accessed 21 June 2017 at <http://www.mckinsey.com/global-themes/asia-pacific/the-archipelago-economy>.
